# Supplementary material
Source: PubMed Central journal article supplement (PMC5536976)
Supplement: NIHMS886352-supplement-Supplemental_2.pdf [file NIHMS886352-supplement-Supplemental_2.pdf]

## Never smokers (n=21)

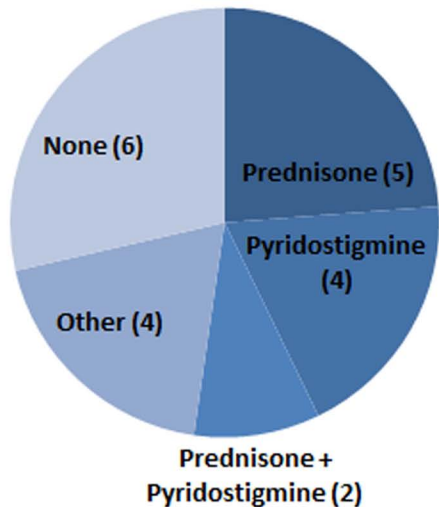

## Current Smokers (n=7)

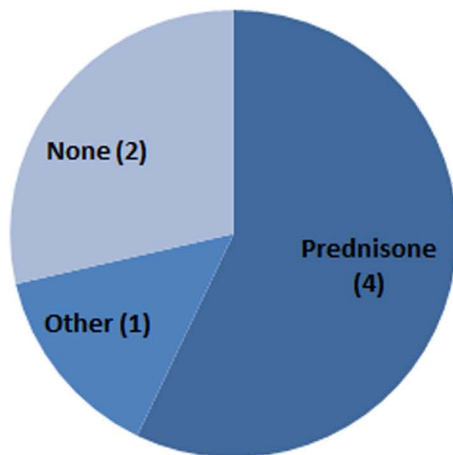

## Former Smokers (n=16)

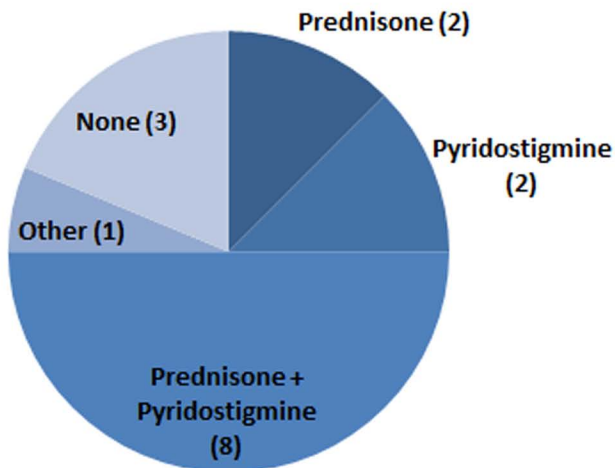

Figure E2: Myasthenia Gravis treatment by smoking group.
